# Supplementary material for: Stable fluorescent CdS:Cu QDs and their hybridization with carbon polymer dots for white light emission
Source: Royal Society of Chemistry journal article supplement (doi:10.1039/c5tc03821a), 2016-01-01
Supplement: c5tc03821a1.pdf [file c5tc03821a1.pdf]

## Journal of Materials Chemistry C

### Electronic Supplementary Information (ESI)

## Stable fluorescent CdS:Cu QDs and their hybridization with carbon polymer dots for white light emission

Manish Kr Mishra, Sangita Kundu and Goutam De\*

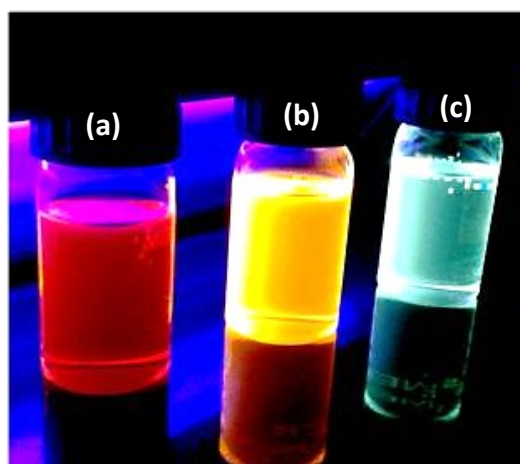

**Fig. S1** Digital photos of (a) red emitting CdS:Cu, (b) yellow emitting and (c) cyan emitting CdS NCs dispersion.

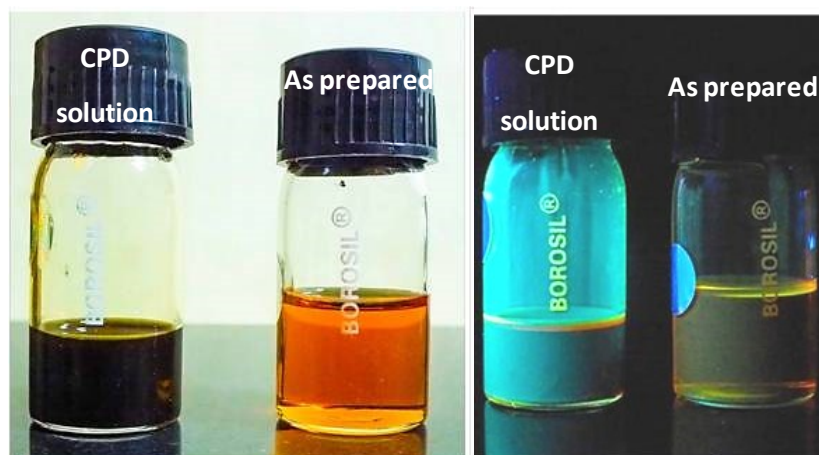

**Fig. S2** Digital photos of CPD and as prepared solution of precursors under visible and UV light ( $\lambda_{\text{ex}} = 365 \text{ nm}$ ).

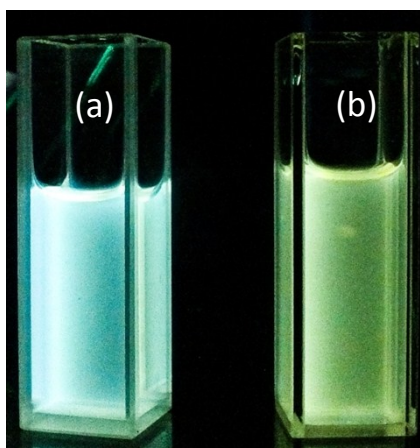

**Fig. S3** Digital photos of (a) CdS (cyan emitting)/CPD and (b) CdS (yellow emitting)/CPD hybrid colloidal solutions showing impure white light emissions.

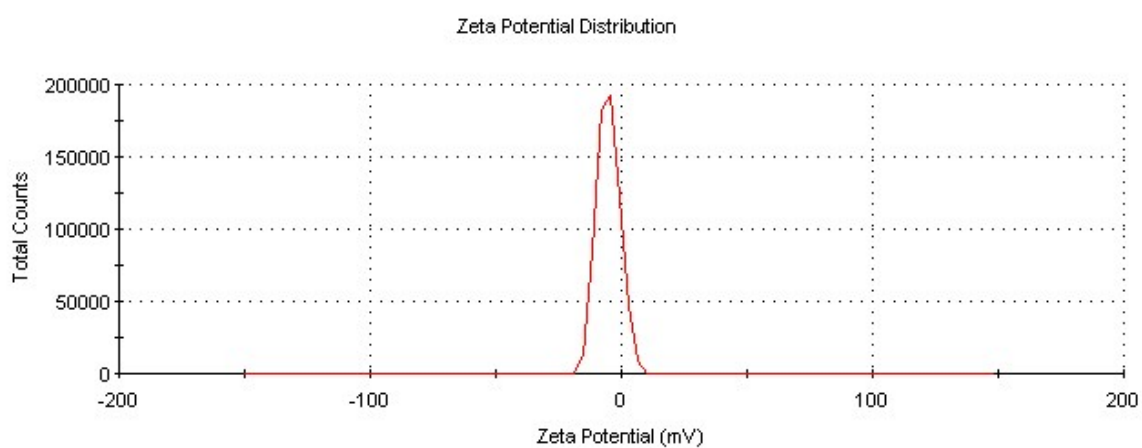

**Fig. S4** Zeta potential distribution of CdS:Cu in CH<sub>3</sub>CN.

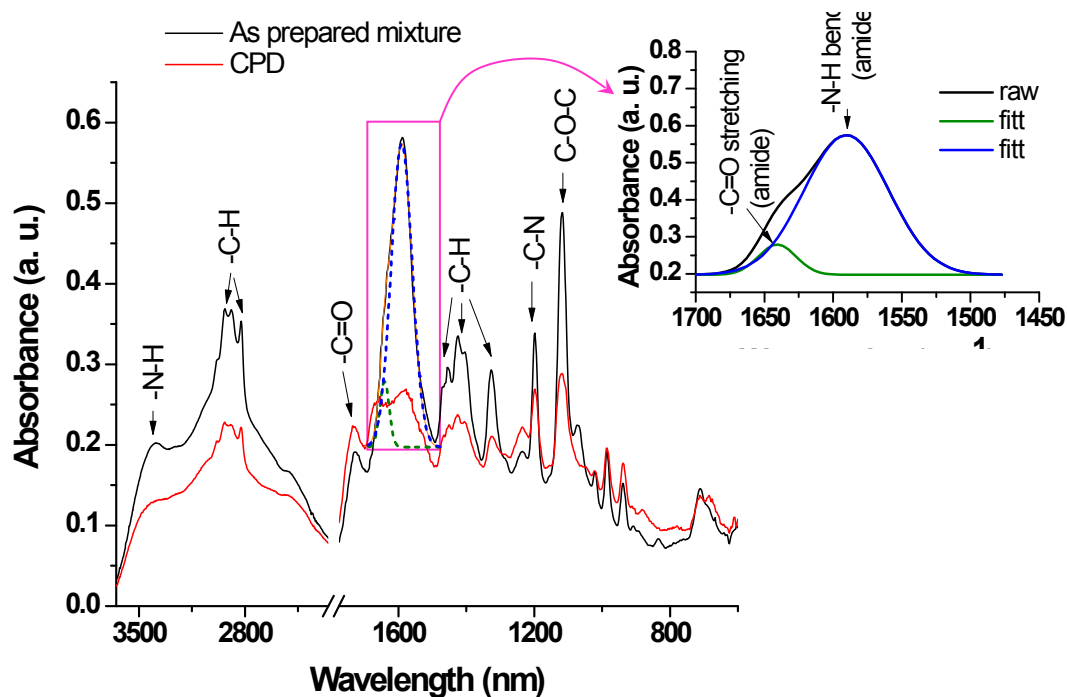

**Fig. S5** FTIR spectra of mixture of PEI and methoxy acetic acid in methoxy ethanol solvent before and after heating at 200 °C. Inset shows the magnified view of deconvoluted peak 1525-1700  $\text{cm}^{-1}$ .

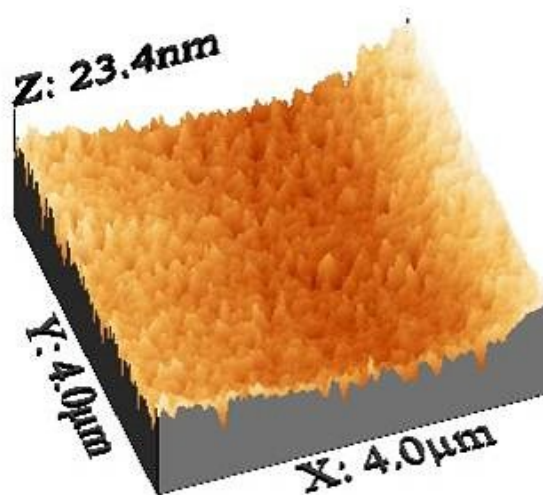

**Fig. S6** 3D AFM image of bare CdS:Cu film (without ORMOSIL support) deposited on 1.8 x 1.5  $\text{cm}^2$  glass substrate by spin coating technique.

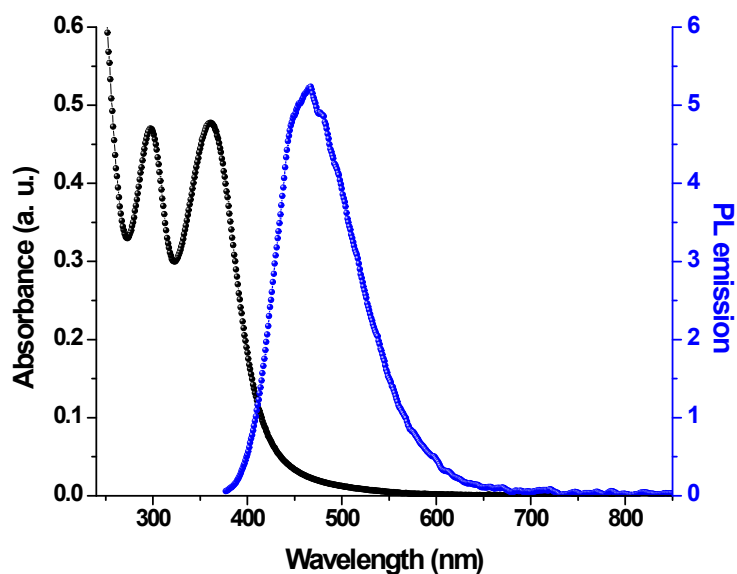

**Fig. S7** UV-visible and PL spectra of pure CPD solution.

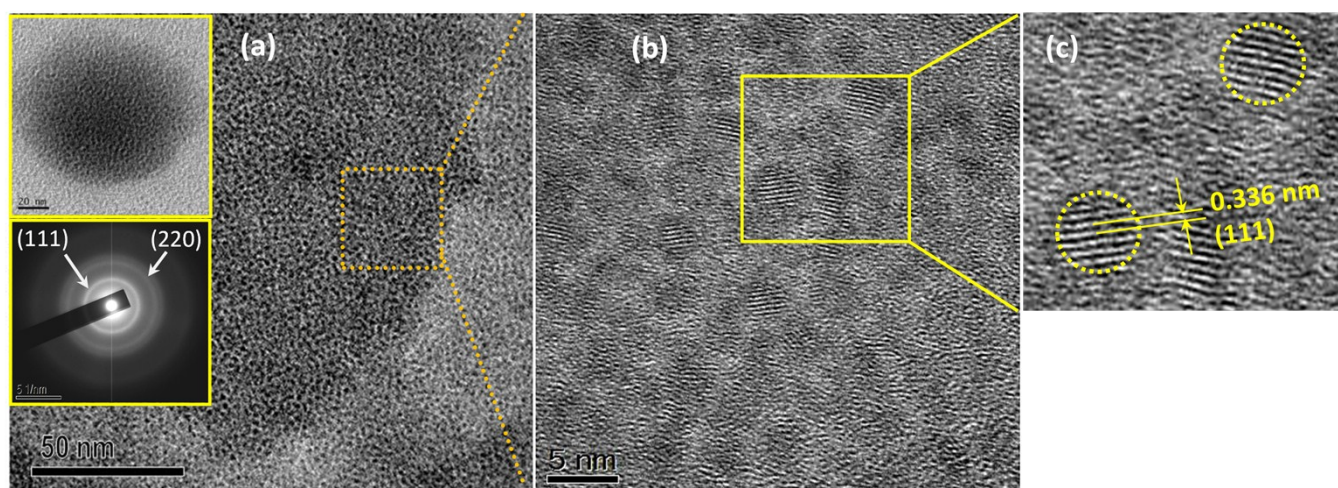

**Fig. S8** (a) Low magnification TEM image of CdS:Cu/CPD white light emitting hybrid. Inset shows full view of CdS:Cu/CPD and SAED pattern corresponding to crystalline CdS:Cu. (b, c) HRTEM showing the characteristic crystalline fringes corresponding to the (111) plane of CdS NCs.

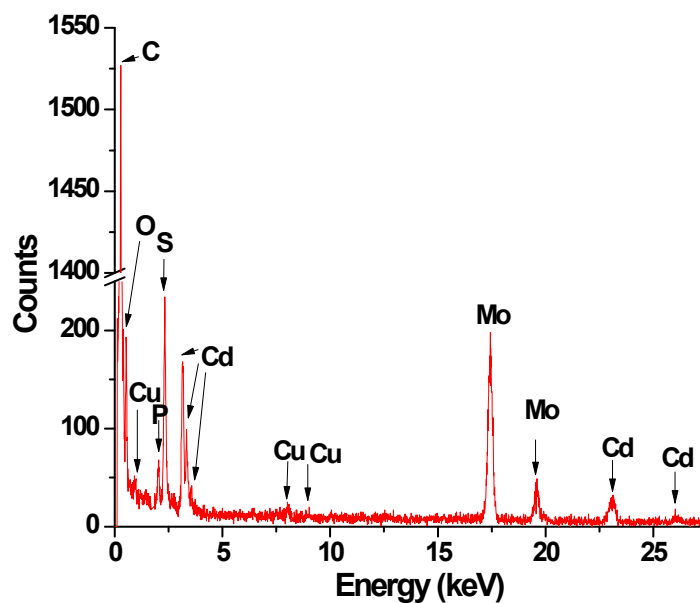

**Fig. S9** EDS pattern of CdS:Cu/CPD white light emitting mixture showing the presence of Cd, S, Cu, P and O. Peaks for Mo is coming from the Mo-grid used for TEM analysis.

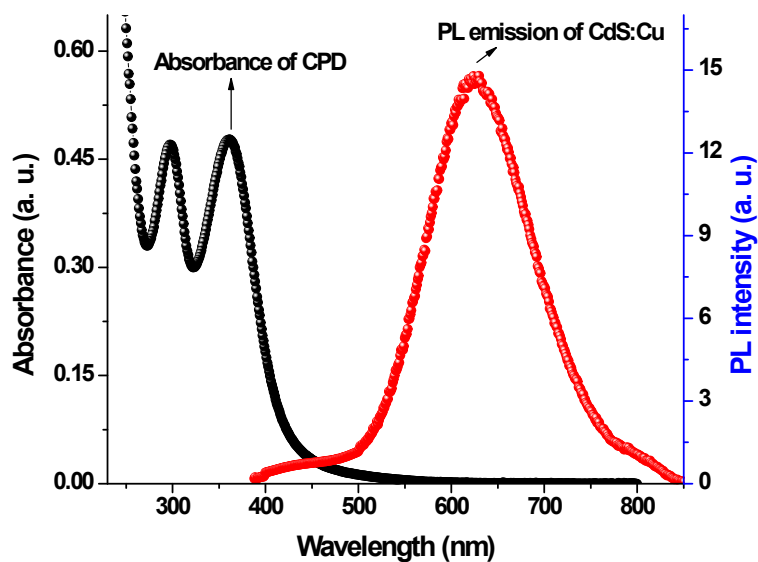

**Fig. S10** UV-visible spectrum of CPD (acceptor) and PL of CdS:Cu (donor) solutions showing negligible overlap.

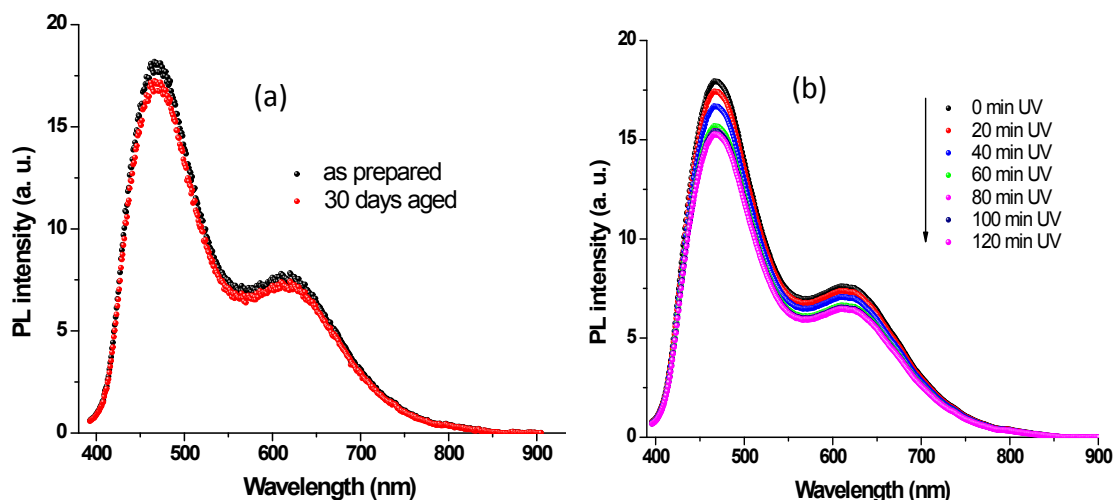

**Fig. S11** PL curves showing the stability of white light emitting CdS:Cu/CPD incorporated ORMOSIL film (a) under ambient condition and (b) UV irradiation.

**Table S1** Relative quantum yield (QY) is measured with respect to  $0.5 \times 10^{-4}$  M aqueous solution of quinine sulfate using equation S1:

$$QY_{\text{sample}} = (F_{\text{sample}}/F_{\text{ref}})(A_{\text{ref}}/A_{\text{sample}})(n_{\text{sample}}^2/n_{\text{ref}}^2) * QY_{\text{ref}} \quad \dots\dots(\text{eqn S1})$$

Where,  $QY_{\text{sample}}$ ,  $F$ ,  $A$ ,  $n$  and  $QY_{\text{ref}}$  denote quantum yield of the sample, integrated area under the PL emission curve, absorbance at excitation wavelength, refractive index of the samples and quantum yield of the reference, respectively.

| Sample name                   | Absorbance at 365 nm | Integrated emission area | Refractive index of the medium | Quantum yield (%) |
|-------------------------------|----------------------|--------------------------|--------------------------------|-------------------|
| Quinine Sulfate (reference)   | 0.042                | 1385.7                   | (Water)= 1.33                  | 58                |
| CdS:Cu                        | 0.031                | 168.35                   | (EtOH)= 1.36                   | 10                |
| CPD                           | 0.05                 | 362.57                   | (EtOH)= 1.36                   | 13.3              |
| White light emitting solution | 0.029                | 155.47                   | (EtOH)= 1.36                   | 9.8               |
| White light emitting Film     | 0.035                | 152.0                    | (ORMOSIL) = 1.489              | 9.5               |
